# Supplementary material for: A unified view of low complexity regions (LCRs) across species
Source: PubMed Central journal article supplement (PMC9470157; doi:10.7554/elife.77058), 2022-09-13
Supplement: elife-77058-transrepform1.pdf [file elife-77058-transrepform1.pdf]

## eLife's transparent reporting form

We encourage authors to provide detailed information *within their submission* to facilitate the interpretation and replication of experiments. Authors can upload supporting documentation to indicate the use of appropriate reporting guidelines for health-related research (see [EQUATOR Network](#)), life science research (see the [BioSharing Information Resource](#)), or the [ARRIVE guidelines](#) for reporting work involving animal research. Where applicable, authors should refer to any relevant reporting standards documents in this form.

If you have any questions, please consult our Journal Policies and/or contact us: [editorial@elifesciences.org](mailto:editorial@elifesciences.org).

### Sample-size estimation

- You should state whether an appropriate sample size was computed when the study was being designed
- You should state the statistical method of sample size computation and any required assumptions
- If no explicit power analysis was used, you should describe how you decided what sample (replicate) size (number) to use

Please outline where this information can be found within the submission (e.g., sections or figure legends), or explain why this information doesn't apply to your submission:

We do not believe this is relevant for our study, because sample-size estimation was not required for our study.

## Replicates

- You should report how often each experiment was performed
- You should include a definition of biological versus technical replication
- The data obtained should be provided and sufficient information should be provided to indicate the number of independent biological and/or technical replicates
- If you encountered any outliers, you should describe how these were handled
- Criteria for exclusion/inclusion of data should be clearly stated
- High-throughput sequence data should be uploaded before submission, with a private link for reviewers provided (these are available from both GEO and ArrayExpress)

Please outline where this information can be found within the submission (e.g., sections or figure legends), or explain why this information doesn't apply to your submission:

Replicates are relevant to experiments done in Figure 2, Figure 2 – figure supplement 1C, Figure 4, and Figure 4 – figure supplement 1.

This information can be found in the Materials and Methods section of the manuscript, in the sections titled 'Immunofluorescence' (for immunofluorescence experiments in Figure 2, Figure 2 – figure supplement 1C, Figure 4, and Figure 4 – figure supplement 1, and 'Droplet formation assays' (for droplet formation assays in Figure 2E).

### Statistical reporting

- Statistical analysis methods should be described and justified
- Raw data should be presented in figures whenever informative to do so (typically when N per group is less than 10)
- For each experiment, you should identify the statistical tests used, exact values of N, definitions of center, methods of multiple test correction, and dispersion and precision measures (e.g., mean, median, SD, SEM, confidence intervals; and, for the major substantive results, a measure of effect size (e.g., Pearson's r, Cohen's d)
- Report exact p-values wherever possible alongside the summary statistics and 95% confidence intervals. These should be reported for all key questions and not only when the p-value is less than 0.05.

Please outline where this information can be found within the submission (e.g., sections or figure legends), or explain why this information doesn't apply to your submission:

Exact p-values for all statistical analyses performed in the manuscript are provided as a separate table file. These analyses correspond to the following figures:  
Figure 3E, F, G  
Figure 3 – figure supplement 3E, F, G, H  
Figure 4 – figure supplement 1A  
Figure 5B, D, E  
Figure 5 – figure supplement 6E, F

(For large datasets, or papers with a very large number of statistical tests, you may upload a single table file with tests, Ns, etc., with reference to sections in the manuscript.)

### Group allocation

- Indicate how samples were allocated into experimental groups (in the case of clinical studies, please specify allocation to treatment method); if randomization was used, please also state if restricted randomization was applied
- Indicate if masking was used during group allocation, data collection and/or data analysis

Please outline where this information can be found within the submission (e.g., sections or figure legends), or explain why this information doesn't apply to your submission:

We do not believe this is relevant for our study, because group allocation was not performed.

**Additional data files (“source data”)**

- We encourage you to upload relevant additional data files, such as numerical data that are represented as a graph in a figure, or as a summary table
- Where provided, these should be in the most useful format, and they can be uploaded as “Source data” files linked to a main figure or table
- Include model definition files including the full list of parameters used
- Include code used for data analysis (e.g., R, MatLab)
- Avoid stating that data files are “available upon request”

Please indicate the figures or tables for which source data files have been provided:

The current manuscript is a largely computational study, and much of the code we developed, and files we generate are used across multiple figures.

All of the code, input, and output files can be found on our zenodo repository at: <https://doi.org/10.5281/zenodo.6568194>. The zenodo link is open access, and a comprehensive README file describes the files in more detail, including data structures, and naming systems.
