# Supplementary material for: A unified view of low complexity regions (LCRs) across species
Source: eLife. 2022 Sep 13;11:e77058. doi: 10.7554/eLife.77058 (PMC9470157; doi:10.7554/eLife.77058)
Supplement: Supplementary file 1. — Exact Benjamini-Hochberg corrected p-values for all Wilcoxon Rank-Sum Tests performed in the manuscript are provided, with the corresponding figures indicated. The columns labelled (1-20) correspond to the amino acids as presented in the order within each respective figure. [file elife-77058-supp1.xlsx]

## Sheet: Sheet1
MANUSCRIPT LOCATION	COMPARTMENT	1	2	3	4	5	6	7	8	9	10	11	12	13	14	15	16	17	18	19	20
Figure 3	Speckle	1.40546e-33	4.12389e-08	8.54037e-08	0.000159857	0.000261683	0.00134988	0.0940831	0.0940831	0.374488	0.773369	0.612311	0.508842	0.398777	0.114596	0.00764156	0.00764156	0.00134988	9.40639e-06	3.54859e-06	2.68902e-25
	ECM	1.70416e-164	4.65669e-141	0.277382	0.946585	0.575394	0.419596	0.417459	0.283044	0.136794	0.0899889	0.0422413	0.0330651	0.0330651	0.0073072	0.000714243	0.000118688	1.09203e-06	1.13275e-08	2.42348e-10	9.3386e-49
	Nucleolus	1.14512e-38	3.16447e-21	1.22638e-07	0.00475801	0.0353175	0.266349	0.571259	0.858049	0.571259	0.359234	0.359234	0.153176	0.0634208	0.0452728	0.00436532	0.00166115	0.000873049	8.10815e-05	1.68826e-10	1.1988e-10
Figure 3 - figure supplement 3	Nuclear Pore	4.33456e-07	3.00064e-06	0.00578481	0.0233779	0.49384	0.556361	0.581729	0.753809	0.984666	0.673143	0.556361	0.549422	0.528083	0.49384	0.196078	0.157474	0.115742	0.114465	0.012966	8.05989e-05
	Centrosome	1.68134e-13	0.00441587	0.0243953	0.083082	0.0920609	0.630696	0.883006	0.883006	0.664151	0.578625	0.578625	0.477348	0.439692	0.31627	0.31627	0.197974	0.0722261	0.0153179	0.00671561	3.82416e-05
	PML body	0.0152088	0.0152088	0.101514	0.331813	0.485192	0.485192	0.485192	0.554793	0.554793	0.554793	0.554793	0.554793	0.554793	0.412325	0.412325	0.382221	0.331813	0.319584	0.0818449	0.026374
	Stress granule	0.0242833	0.124577	0.125274	0.194526	0.230436	0.285326	0.329806	0.510869	0.782284	0.830232	0.918238	0.782284	0.782284	0.435609	0.416617	0.416617	0.230436	0.125274	0.125274	2.7107e-06
Figure 4 - figure supplement 1A	Nucleolus vs speckle	2.16113e-07	0.000255796	0.000909568	0.0362175	0.324111	0.393006	0.55877	0.55877	0.583537	0.583537	0.583537	0.583537	0.678215	0.55877	0.130946	0.0817077	0.00213299	3.72415e-08	1.0329e-08	1.61575e-11
Figure 5	Nucleolus human	4.96019e-96	5.64093e-62	1.54965e-19	2.29687e-08	0.950409	0.443838	0.278313	0.233047	0.194757	0.0450635	0.0143054	0.000670435	0.000413419	0.000263565	4.76762e-06	7.28457e-07	1.5632e-09	9.47417e-11	2.37719e-11	7.86975e-21
	Nucleolus yeast	9.98148e-13	2.59298e-09	1.6852e-06	0.00584091	0.660734	0.65025	0.65025	0.580823	0.580823	0.580823	0.474901	0.390865	0.385612	0.2186	0.149611	0.0938659	0.0104376	0.000106295	5.54677e-07	2.48889e-07
	Cellwall arabidopsis	1.05495e-22	4.26632e-19	0.0039386	0.00407827	0.13219	0.54075	0.957216	0.957216	0.962411	0.54075	0.482437	0.12843	0.0171611	0.00107086	0.00107086	1.01925e-05	1.37633e-07	1.06468e-07	3.60727e-09	6.11737e-11
	Cellwall yeast	5.03013e-66	7.66812e-36	2.02118e-05	0.000796226	0.0180307	0.626018	0.686598	0.709351	0.709351	0.626018	0.371155	0.0124216	0.00835188	0.00555839	0.00555839	0.00228785	1.82534e-06	8.58893e-07	5.18796e-08	6.31258e-16
Figure 5 - figure supplement 6	Speckle human	6.05115e-94	4.56284e-12	1.89491e-10	7.30615e-08	5.10889e-06	0.000209766	0.000456271	0.241754	0.678043	0.132228	0.132228	0.0991327	0.00887365	8.0356e-05	2.14912e-05	3.00118e-06	6.33822e-07	3.7673e-07	1.57725e-12	9.83103e-32
	Speckle arabidopsis	1.6902e-12	0.000700121	0.481289	0.559347	0.565925	0.66798	0.519768	0.472827	0.472827	0.472827	0.429101	0.405426	0.405426	0.304014	0.304014	0.15453	0.123411	0.0906752	2.45738e-07	3.50464e-10
